# Supplementary material
Source: Springer Nature journal article supplement (https://www.springermedizin.de/resource/supplementary/12889_2009_1954_MOESM5_ESM.pdf/9485450)
Supplement: MOESM5 [file 9485450]

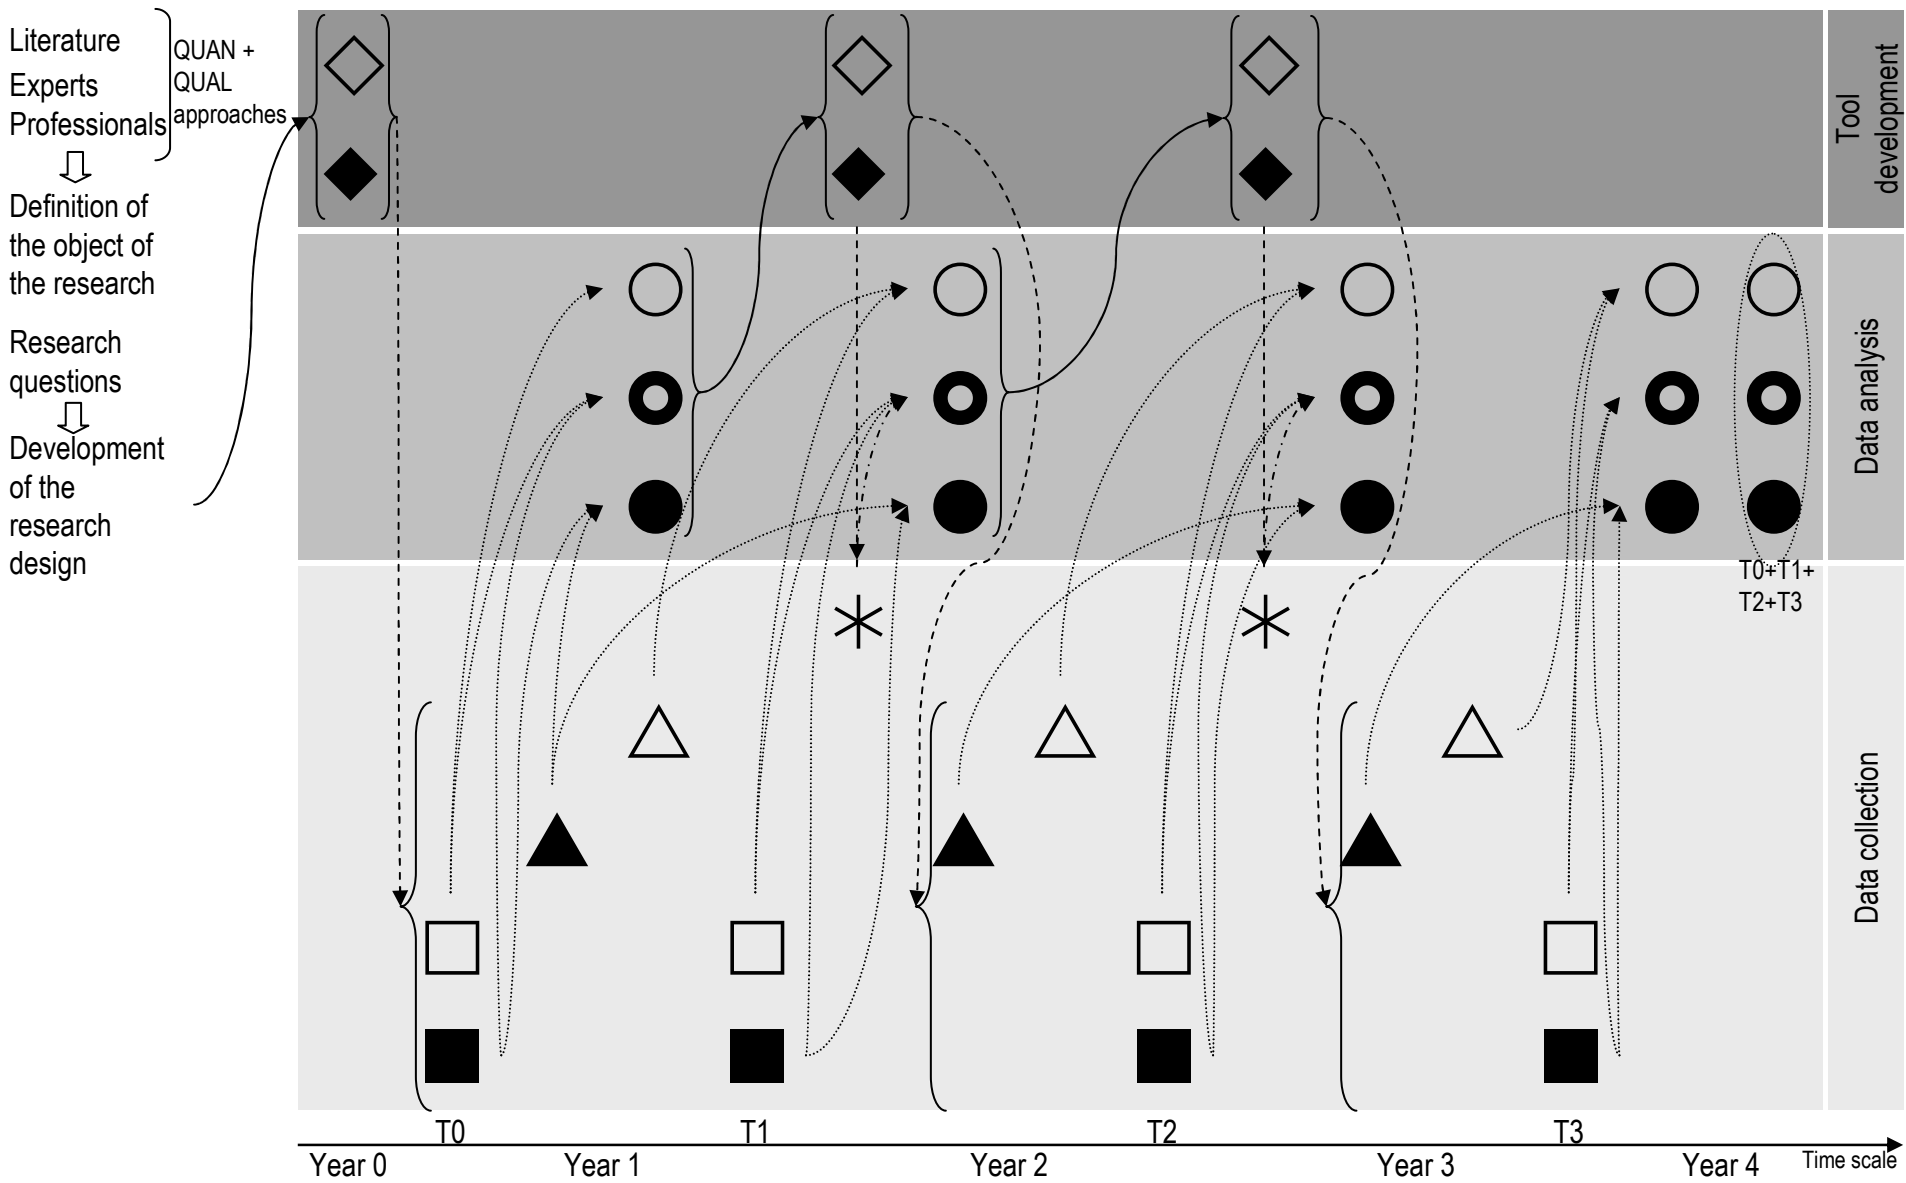

- QUAN**
- ▲ Collection of quantitative contextual data
  - Collection of quantitative data
  - Quantitative data analysis
  - ◆ Quantitative data collection tools' development
  - Quantitatizing/Qualitazing data analysis

- Actions:
- QUAL**
- △ Collection of qualitative contextual data
  - Collection of qualitative contextual data
  - Qualitative data analysis
  - ◇ Qualitative data collection tools' development
  - \* Semi-structured interview / group interview

- Relationships:
- Used to develop data collection tools
  - - - Used to collect data
  - ⋯⋯⋯ Introduced in the analysis
  - - - Used to validate results
